# Supplementary material for: Structural mechanism of phospholipids translocation by MlaFEDB complex
Source: PubMed Central journal article supplement (PMC7784689; doi:10.1038/s41422-020-00404-6), 2020-09-03
Supplement: 41422_2020_404_MOESM3_ESM.pdf [file 41422_2020_404_MOESM3_ESM.pdf]

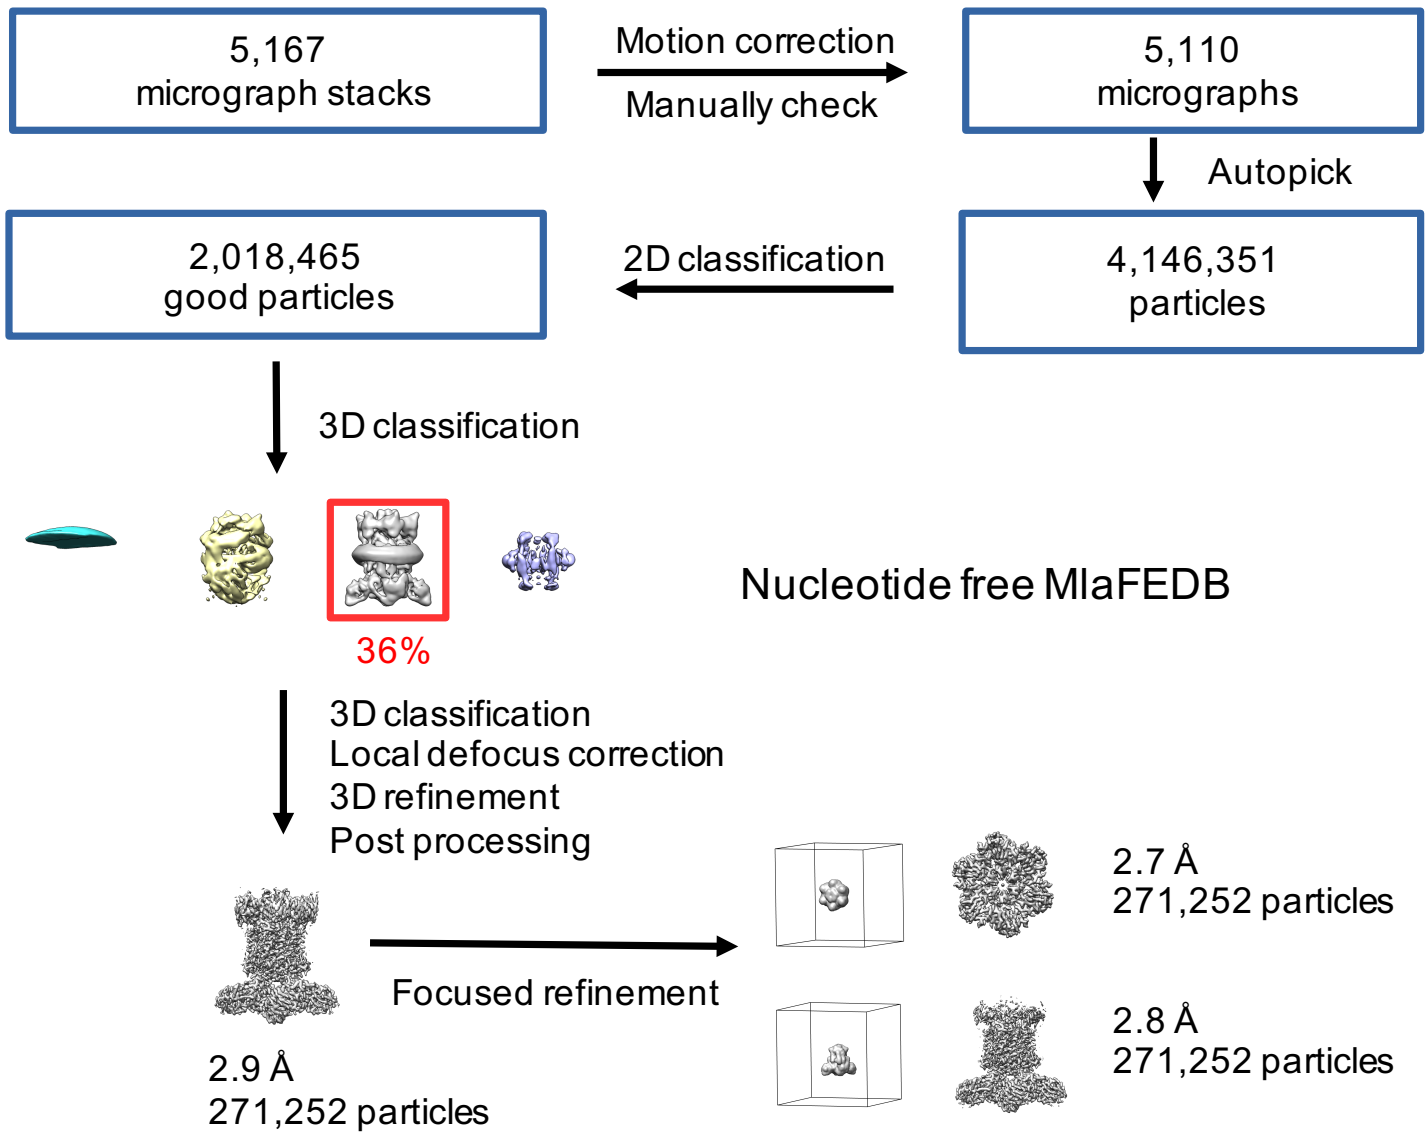

**Supplementary information, Fig. S3 Image processing for the cryo-EM data of nucleotide-free MiaFEDB.** Flow chart for cryo-EM data processing. For details, see ‘Data processing’ in the Methods section.
