# Supplementary material for: Structural mechanism of phospholipids translocation by MlaFEDB complex
Source: PubMed Central journal article supplement (PMC7784689; doi:10.1038/s41422-020-00404-6), 2020-09-03
Supplement: 41422_2020_404_MOESM5_ESM.pdf [file 41422_2020_404_MOESM5_ESM.pdf]

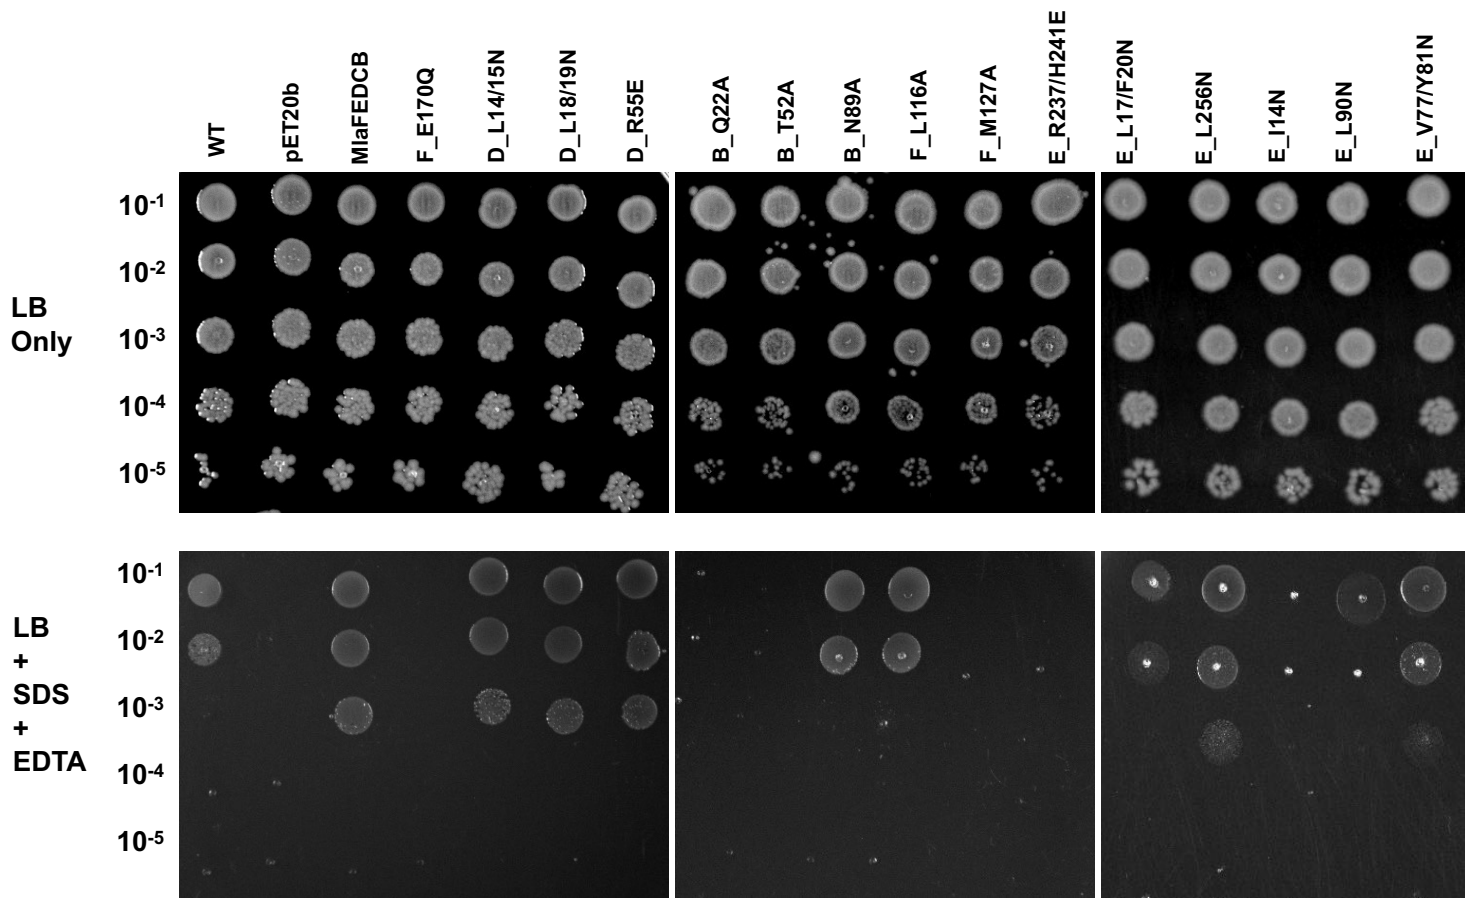

Supplementary information, Fig. S5 Complementation of point mutants in *MiaFEDCB* deletion strain.
