# Supplementary material for: Structural mechanism of phospholipids translocation by MlaFEDB complex
Source: PubMed Central journal article supplement (PMC7784689; doi:10.1038/s41422-020-00404-6), 2020-09-03
Supplement: 41422_2020_404_MOESM6_ESM.pdf [file 41422_2020_404_MOESM6_ESM.pdf]

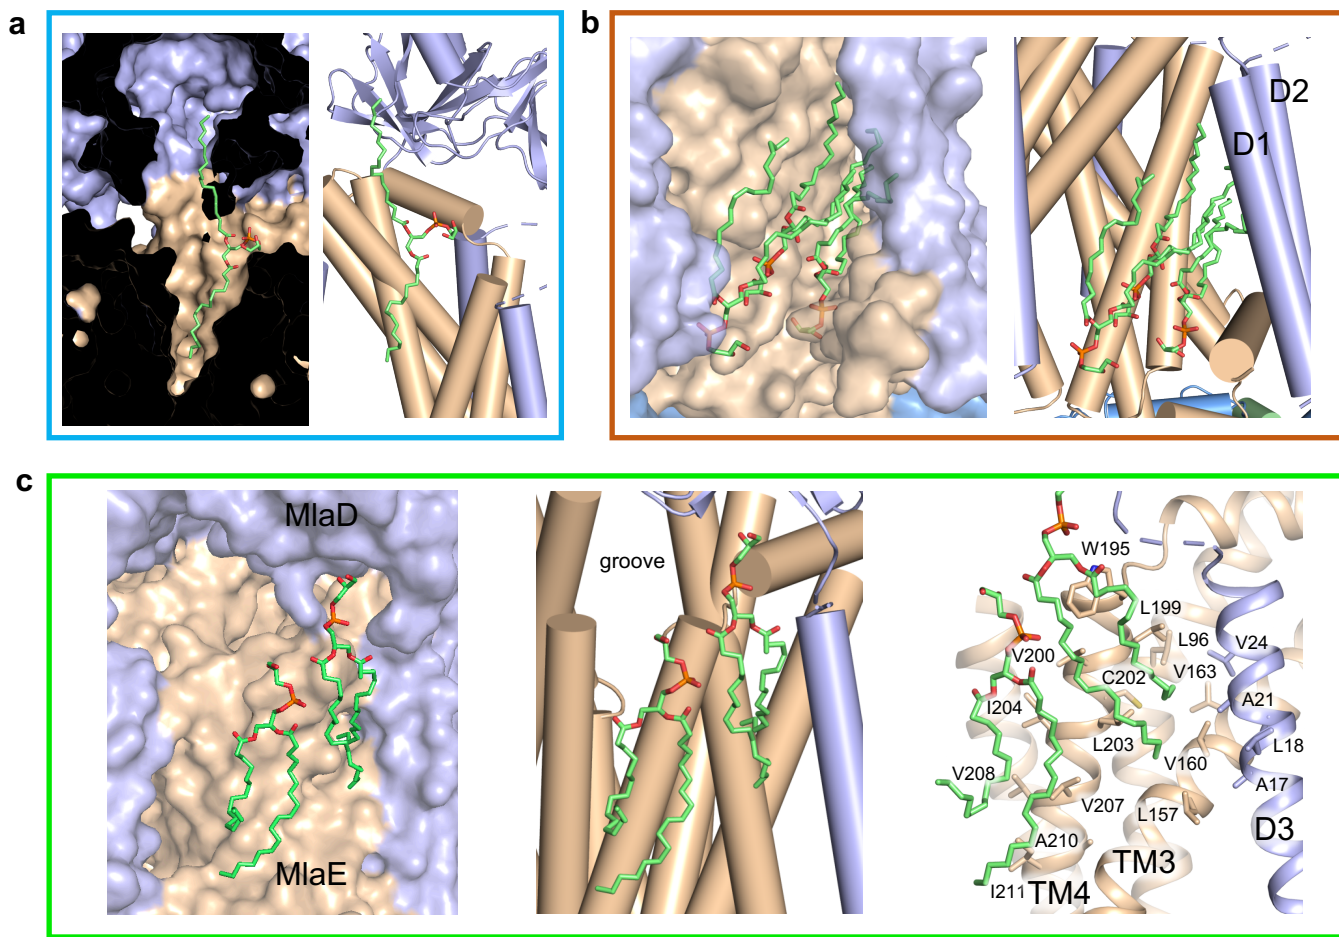

**Supplementary information, Fig. S6 Interactions between phospholipids and nucleotides with MlaFEDB. a,** Cross-sectional view of the phospholipids bound in the central cavity. MlaD and MlaE are shown in light blue and wheat, respectively. **b,** Cross-sectional view of the phospholipids bound in the lower side cavity. **c,** Cross-sectional view of the phospholipids bound in the upper side cavity, showing the tight fit of the phospholipid acyl chains into the hydrophobic cavity.
