# Supplementary material for: Structural mechanism of phospholipids translocation by MlaFEDB complex
Source: PubMed Central journal article supplement (PMC7784689; doi:10.1038/s41422-020-00404-6), 2020-09-03
Supplement: 41422_2020_404_MOESM8_ESM.pdf [file 41422_2020_404_MOESM8_ESM.pdf]

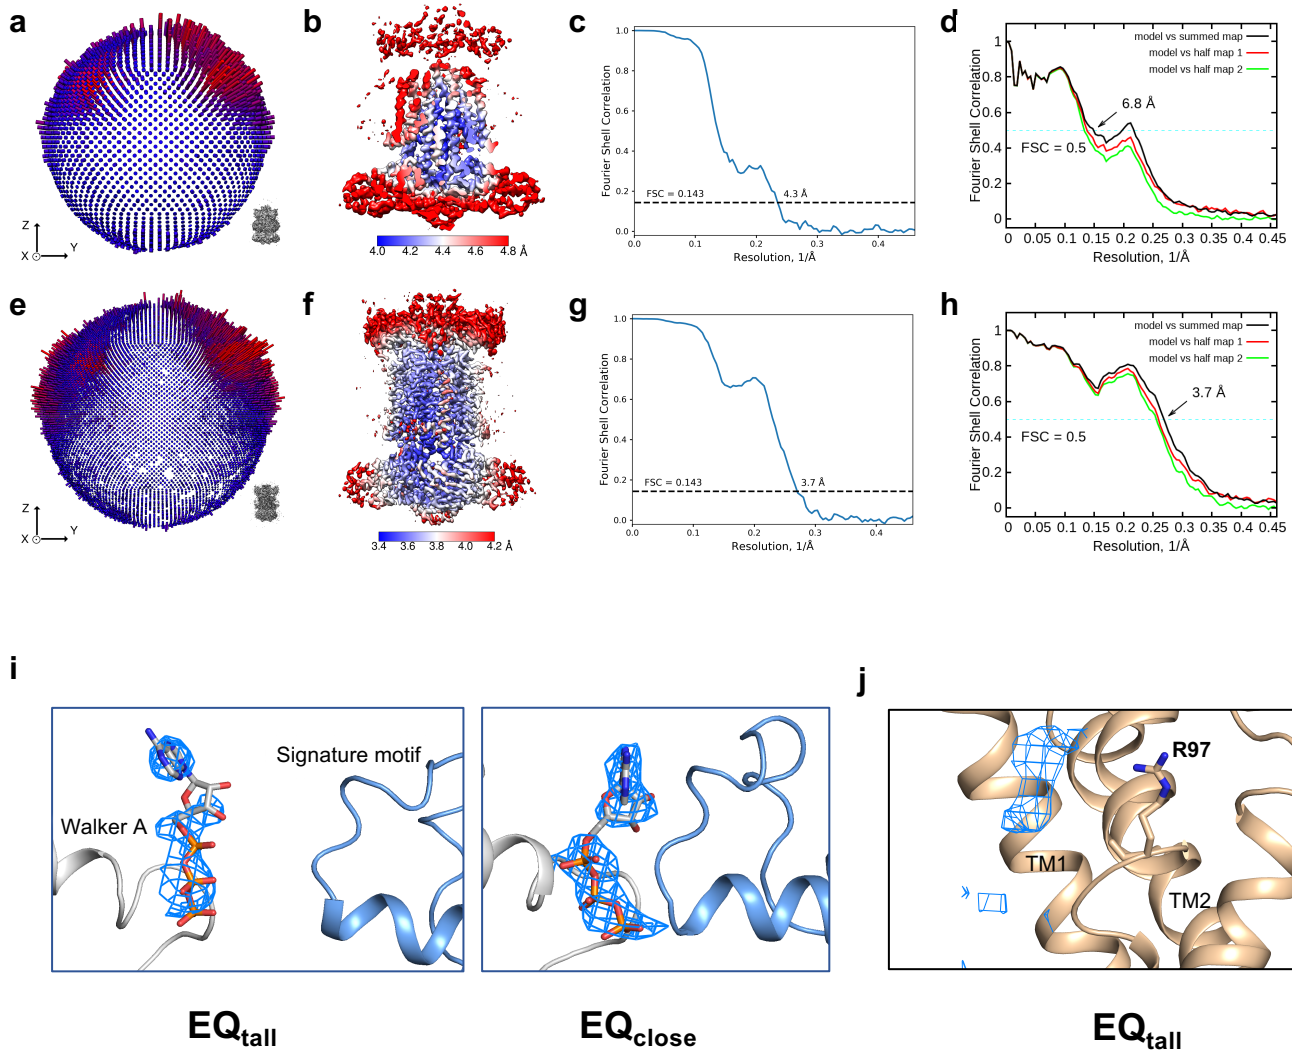

**Supplementary information, Fig. S8 Single-particle cryo-EM analysis of ATP-bound MlaF<sub>EQ</sub>EDB in nanodiscs.** **a-d** cryo-EM analysis of EQ<sub>tall</sub> state. **a**, Angular distribution of particle images in EQ<sub>tall</sub> state. **b**, Local resolution of the final cryo-EM map of EQ<sub>tall</sub> state. **c**, Gold standard FSC curve for the 3D refinement of EQ<sub>tall</sub> state (blue). **d**, FSC curve of EQ<sub>tall</sub> state between the atomic model and the final map with indicated resolution at FSC=0.5 (black); FSC curve between half map 1 (red) or half map 2 (green) and the atomic model refined against half map 1. **e-h** are cryo-EM analysis of EQ<sub>close</sub> state, which are same to **a-d** in order. **i**, Cryo-EM densities for the nucleotides bound at the ATP-binding sites of two subunits of MlaF in EQ<sub>tall</sub> and EQ<sub>close</sub>. **j**, the interaction between the phospholipids and EQ<sub>tall</sub> state, the acyl chain density is shown in blue.
