# Supplementary material for: Structural mechanism of phospholipids translocation by MlaFEDB complex
Source: PubMed Central journal article supplement (PMC7784689; doi:10.1038/s41422-020-00404-6), 2020-09-03
Supplement: 41422_2020_404_MOESM9_ESM.pdf [file 41422_2020_404_MOESM9_ESM.pdf]

**Supplementary information, Table S1 Statistics of the cryo-EM structures presented in this study.**

| <b>Data collection</b>                    |                                        |                        |                     |
|-------------------------------------------|----------------------------------------|------------------------|---------------------|
| EM equipment                              | Titan Krios (Thermo Fisher Scientific) |                        |                     |
| Voltage (kV)                              | 300                                    |                        |                     |
| Detector                                  | Gatan K3 Summit                        |                        |                     |
| Energy filter                             | Gatan GIF Quantum, 20 eV slit          |                        |                     |
| Pixel size (Å)                            | 1.087                                  |                        |                     |
| Electron dose (e-/Å <sup>2</sup> )        | 50                                     |                        |                     |
| Defocus range (µm)                        | -1.2 ~ -2.2                            |                        |                     |
| Sample                                    | Nucleotide-free                        | ATP-bond               |                     |
|                                           | MlaFEDB                                | MlaF <sub>EQ</sub> EDB |                     |
| Number of collected micrographs           | 5,167                                  | 2,569                  |                     |
| Number of selected micrographs            | 5,110                                  | 2,481                  |                     |
| <b>3D Reconstruction</b>                  |                                        |                        |                     |
| Software                                  | Relion 3.0                             |                        |                     |
| Comformation                              | Apo                                    | EQ <sub>tall</sub>     | EQ <sub>close</sub> |
| Number of used particles (Overall)        | 271,252                                | 17,109                 | 21,159              |
| Resolution (Å)                            | 2.9/ 2.7/ 2.8 <sup>a</sup>             | 4.3                    | 3.7                 |
| Symmetry                                  | C2/ C6/ C2 <sup>a</sup>                | C1                     |                     |
| Map sharpening B-factor (Å <sup>2</sup> ) | 200/ 90/ 90 <sup>a</sup>               | 150                    |                     |
| <b>Refinement</b>                         |                                        |                        |                     |
| Software                                  | Phenix                                 |                        |                     |
| Cell dimensions                           |                                        |                        |                     |
| a=b=c (Å)                                 | 347.84                                 | 217.40                 |                     |
| α=β=γ (°)                                 | 90                                     | 90                     |                     |
| Model composition                         |                                        |                        |                     |
| Protein residues                          | 2,092                                  | 2,092                  | 2,092               |
| Side chains assigned                      | 2,038                                  | 2,038                  | 2,038               |
| lipid                                     | 12                                     | N/A                    | N/A                 |
| ADP-vanadate                              | N/A                                    | N/A                    | N/A                 |
| ATP                                       | N/A                                    | 2                      | 2                   |
| R.m.s deviations                          |                                        |                        |                     |
| Bonds length (Å)                          | 0.006                                  | 0.007                  | 0.007               |
| Bonds Angle (°)                           | 1.131                                  | 1.085                  | 1.118               |
| Ramachandran plot statistics (%)          |                                        |                        |                     |
| Preferred                                 | 87.74                                  | 88.96                  | 87.84               |
| Allowed                                   | 11.09                                  | 10.46                  | 11.72               |
| Outlier                                   | 1.17                                   | 0.58                   | 0.44                |
